# Supplementary material for: Identification of Novel Pax8 Targets in FRTL-5 Thyroid Cells by Gene Silencing and Expression Microarray Analysis
Source: PubMed Central journal article supplement (PMC3179481; doi:10.1371/journal.pone.0025162), 2011-09-23
Supplement: pone.0025162.s003.pdf [file pone.0025162.s003.pdf]

Supplemental Table 3. ChIP rat oligonucleotides list.

| <b>GENE NAME</b> | <b>FORWARD PRIMER 5'-3'</b> | <b>REVERSE PRIMER 5'-3'</b> |
|------------------|-----------------------------|-----------------------------|
| Rab17            | CCAGGATAGTCCCTCTCTCC        | AGCTCAAGCCTCAGAGCACC        |
| Trib1            | CTCGATCCCCACAACCTGTC        | CTACCGGAAGCAGTCAAGCTC       |
| Wnt4             | GATCCAGAAGCGAGGTTTCGG       | AACCTAGTCACTAGCGCTCGG       |
| Tg               | ATGTCCTGGAGTGGTCACCC        | GGGTAGGAGCAGTGTCCCATC       |
| Kcnj16           | GATGAAGGTCCACAGGAACCC       | GTGACCAACAGCTGCAGCAAC       |
| Cdh16            | AGAAGTGGGGCCAAGTCTGAAGCC    | GGGGCGAGGCAAGGTGGACACTT     |
| Foxe1            | CAGCGGAGGGAGGAGCTG          | CATGCCGCACCTCTGCGG          |
| Runx2            | CTACGGAACTGGAACCGGGA        | TTTGTCCCAGCCGAGGCAAG        |
| Cited2           | GAAAACCTCTGCTGGGCAGGG       | CGGACTGTGGTGTCTTTCTGG       |
| TAZ              | GAATGCAGATAGAGCGCTCGG       | GGCCGAAAGTGGAGCTGTTG        |
| Sparc            | GATGAGGACGATGCCACCAG        | TCCTGGGCATTACCCGAGAG        |
